# Supplementary material for: Common Factors Underlying the Five Facets of Mindfulness and Proposed Mechanisms: a Psychometric Study Among Meditators and Non-meditators
Source: Springer Nature journal article supplement (doi:10.1007/s12671-020-01492-6), 2020-09-02
Supplement: MOESM1 [file 18339672]

*Revelle’s* ω *total of all Scales and Subscales, and Mean Scores and Standard Deviations among Non-Meditators and Meditators*

| Scale or subscale | ω | Non-meditators | Meditators | Cohen *d* |
| --- | --- | --- | --- | --- |
| FFMQ Observing | .82 | 3.41 (0.63) | 3.82 (0.58) | -0.70*** |
| FFMQ Describing | .92 | 3.59 (0.69) | 3.82 (0.66) | -0.35*** |
| FFMQ Acting with Awareness | .88 | 3.37 (0.61) | 3.45 (0.58) | -0.14** |
| FFMQ Nonjudging | .92 | 3.63 (0.76) | 3.75 (0.74) | -0.17** |
| FFMQ Nonreacting | .86 | 3.08 (0.61) | 3.32 (0.59) | -0.40*** |
| NAS Nonattachment | .92 | 4.21 (0.62) | 4.45 (0.63) | -0.38*** |
| SBC Body Awareness | .87 | 2.54 (0.57) | 2.91 (0.54) | -0.65*** |
| SBC Body Association | .82 | 2.82 (0.52) | 2.85 (0.55) | -0.06 |
| EQ Accepting Self-Perception | .78 | 2.78 (0.66) | 2.96 (0.58) | -0.30*** |
| EQ Distanced Perspective | .78 | 1.94 (0.69) | 2.11 (0.67) | -0.25*** |
| EC Attentional Control | .76 | 4.33 (1.04) | 4.43 (1.05) | -0.10 |
| EC Inhibitory Control | .67 | 4.30 (0.86) | 4.46 (0.89) | -0.19*** |
| EC Activation Control | .83 | 4.55 (1.00) | 4.68 (0.96) | -0.13* |
| DERS Acceptance | .92 | 3.86 (0.79) | 4.01 (0.74) | -0.20*** |
| DERS Goal-directed Behavior | .90 | 3.51 (0.85) | 3.61 (0.81) | -0.11* |
| DERS Control | .91 | 4.17 (0.70) | 4.24 (0.64) | -0.11* |
| DERS Awareness | .86 | 3.37 (0.73) | 3.74 (0.72) | -0.51*** |
| DERS Strategies | .92 | 4.00 (0.76) | 4.18 (0.69) | -0.25*** |
| DERS Clarity | .87 | 3.97 (0.69) | 4.14 (0.64) | -0.26*** |
| BSI Depression | .94 | 0.54 (0.67) | 0.43 (0.58) | 0.18** |
| BSI Anxiety | .87 | 0.43 (0.55) | 0.39 (0.50) | 0.07 |
| BSI Somatization | .82 | 0.59 (0.54) | 0.59 (0.51) | 0.00 |
| PSQ Total score | .95 | 2.20 (0.56) | 2.07 (0.54) | 0.23*** |

*Note.* FFMQ = Five Facet Mindfulness Questionnaire, NAS = Nonattachment Scale, SBC = Body Connection Scale, EQ = Decentering scale, EC = Effortful Control scale, DERS = Difficulties in Emotion Regulation Scale, BSI = Brief Symptoms Inventory, PSQ = Perceived Stress Questionnaire. Analysis *n*s = 2852-2857 for non-meditators, and 406-408 for meditators. **p* < .05, ***p* < .01, ****p* < .001 according to independent *t* tests.

*Models of Measurement Invariance (see Marsh et al., 2014)*

|  | Restricted parameters | | | | |
| --- | --- | --- | --- | --- | --- |
| Measurement invariance model | Factor loadings | Item intercepts | Factor covariances | Factor means | Item uniquenesses |
| Model 0: Configural invariance |  |  |  |  |  |
| Model 1: Weak measurement invariance | X |  |  |  |  |
| Model 2: Strong measurement invariance | X | X |  |  |  |
| Model 3: Strict measurement invariance | X | X | X |  |  |
| Model 4: Manifest mean invariance | X | X | X | X |  |
| Model 5: Complete factorial invariance | X | X | X | X | X |

*Mplus Syntax for the Comparison of Non-Meditators and Meditators*

title: final model for meditator/non-meditator group comparison

data: **file** = dataset.dat;

variable: **names** = FFMQ_Obs .... DERS_Cla meditation; ! variable names in dataset

**usevar** = FFMQ_Obs .... DERS_Cla meditation; ! variables used in analysis

**grouping** = meditation (0=non-meditators 1=meditators); ! multi-group analysis

**missing** = all(-99);

analysis: **type** = general;

**estimator** = MLR; ! robust maximum likelihood estimator

model: f1-f5 BY FFMQ_Obs - DERS_Cla (*1); ! analysis of factor structure

! „(*1)“ indicates that factors are EFA factors

! restrictions for measurement invariance (strict MI):

! factor loadings: default = equality constraint on factor loadings in groups

! factor intercepts: default = equality of factor indicator intercepts

! factor means: default = means fixed @0 in group 1, free in group 2

! „item“ uniqueness: default = free

! factor co/variances: covariances held equal across groups:

f1 with f2 (1); f1 with f3 (2); f1 with f4 (3); f1 with f5 (4);

f2 with f3 (5); f2 with f4 (6); f2 with f5 (7);

f3 with f4 (8); f3 with f5 (9);

f4 with f5 (10);

f1-f5@1; ! factor variances fixed at 1 in both groups

DERS_Acc WITH FFMQ_Njd; ! model modification

BSI_Dprs BSI_Anx BSI_Soma PSQ_Tot ON f1-f5; ! path analyses

output: sampstat standardized stdyx modindices(all);
